# Supplementary material for: Entomopathogenic fungi decrease Rhizoctonia disease in potato in field conditions
Source: PeerJ. 2020 Sep 16;8:e9895. doi: 10.7717/peerj.9895 (PMC7501787; doi:10.7717/peerj.9895)
Supplement: Dataset S1 [file peerj-08-9895-s004.xlsx]

## Sheet: Height and weight
		4 weeks post-planting											7 weeks post-planting
		Height, cm				Weight, g							Height, cm				Weight, g
		Control	M.robertsii	B. bassiana		Control	M.robertsii	B. bassiana					Control	M.robertsii	B. bassiana		Control	M.robertsii	B. bassiana
		14.3	18.4	16.42		32.486	32.4	28.8					48.34	53.15	54.86		178.5	277.75	299.4
		14.2	16.4	17.4		19.722	28.804	27.2					55.975	57.35	63.86		246.75	294.333	378.8
		14.36	12.5	18.38		19.926	31	29.4					49.475	46.25	51.6		231	187	195.2
		15.68	11.94	16.58		24.448	32.2	34.6					49.425	57.85	57.72		278.333	248.25	315.4

## Sheet: Rhizoctonia disease
Death of sprouts				RSI (1record)				RSI (2record)				Incidence of stolons				Death of stolons
Control	M. robertsii	B. bassiana		Control	M. robertsii	B. bassiana		Control	M. robertsii	B. bassiana		Control	M. robertsii	B. bassiana		Control	M. robertsii	B. bassiana
0	0	0		15.7895	11.25	11.1111		22.6667	30.9091	20		5.55556	2.17391	2.43902		1.38889	8.69565	0
28.6	0	0		47.1429	23.75	10		35.2941	16.9231	27.7778		10.5769	10.6061	4.58716		5.76923	3.0303	6.42202
14.3	0	0		48.5714	13.3333	10		52	34.2857	24.6154		8.75	5.88235	4.10959		11.25	8.82353	0
36.7	25	0		52	39	10.6667		52.2222	23.75	18.5714		7.22892	3.44828	3.52941		8.43373	1.14943	4.70588

## Sheet: Yield
yield, kg/100 bushes				Si				healthy tubers				sclerotia free tubers						Fractional composition, %
Control	M. robertsii	B. bassiana		Control	M. robertsii	B. bassiana		Control	M. robertsii	B. bassiana		Control	M. robertsii	B. bassiana			small fraction	Control	M. robertsii	B. bassiana
57.4	56.9	79.2		0.8	0.7	0.4		40	45	40		85	90	100				5.2	6	2.2
59.8	66.5	67.8		1	0.3	0.8		50	50	40		80	100	90				6	5.5	3.4
68	71.4	56.2		0.7	0.37	0.4		50	55	35		90	100	95				3.9	6.6	3.4
45.7	64	72.2		0.95	0.4	0.4		30	65	30		90	95	100				4.2	6	4
																	medium fraction	Control	M. robertsii	B. bassiana
																		46.3	55.6	33.4
																		39.9	37	27
																		34	51.6	37.1
																		45.1	30.4	28.7
				control
				Metarhizium
				Beauveria													large fraction	Control	M. robertsii	B. bassiana
																		48.5	38.4	64.4
control		0.273375	0.0957199															54.1	57.5	69.6
Metarhizium	0.273375		0.505156															62.1	41.8	59.5
Beauveria	0.0957199	0.505156																50.7	63.6	67.3
Current effect: F(2, 9)=1,7681, p=,22508

## Sheet: Colonization of soil
Colonization of soil
preplanting							postplanting
							B. bassiana			M. robertsii			Control
CFU/dishe	CFU/g						CFU/dishe	CFU/g		CFU/dishe	CFU/g		CFU/dishe	CFU/g
B. bassiana							26	2311.11		57	5066.67		B. bassiana
3	266.667						57	5066.67		69	6133.33		2	177.778
1	88.8889						29	2577.78		24	2133.33		1	88.8889
0	0						21	1866.67		29	2577.78		7	622.222
2	177.778												2	177.778
M. robertsii													M. robertsii
CFU/dishe	CFU/g												1	88.8889
2	177.778												1	88.8889
1	88.8889												0	0
4	355.556												2	177.778
0	0
													B. bassiana+M. robertsii
													3	266.667
													2	177.778
													7	622.222
													4	355.556

## Sheet: Colonization of plants
Colonization of plants
B. bassiana						M. robertsii						Control
leaves	stems	roots	imprints	roots without sterilization		leaves	stems	roots	imprints	roots without sterilization		leaves	stems	roots	imprints	roots without sterilization
		1		1						1
				1				1		1
		1		1
				1		1	1	1	1	1
										1
		1		1
										1
		1		1						1
				1										1	1	1
1	1	1	1	1						1
				1				1		1
				1				1		1
1	1	1	1	1
	1	1		1						1
1	1	1	1	1				1		1
								1		1
		1		1
		1		1		1	1	1		1
1	1	1		1						1

## Sheet: POX
	4 weeks post-planting												7 weeks post-planting
	POX activity in roots					POX activity in leaves							POX activity in roots					POX activity in leaves
	Control	M. robertsii	B. bassiana			Control	M. robertsii	B. bassiana					Control	M. robertsii	B. bassiana			Control	M. robertsii	B. bassiana
	1.70515	4.19767	3.05907			3.50089	11.1454	7.85892					2.00735	1.28786	1.58091			2.43463	1.92627	3.58344
	2.74686	2.53612	3.3283			4.41275	4.40666	2.27118					1.9332	1.67813	1.21798			2.91117	4.56318	3.39757
	1.88905	4.65562	4.70356			10.7666	23.116	28.2586					3.73629	1.44323	1.84496			4.82293	2.92888	3.6432
	2.00723	4.20234	2.5772			3.28677	8.24366	16.7821					1.6768	1.64543	1.64061			3.08913	3.0871	2.58707
	1.45691	1.77141	2.75686			3.26682	14.0132	3.1434					2.4502	2.22647	1.74979			3.03217	2.34584	2.26626
	1.59584	3.14307	6.21101			13.4407	10.1656	8.01417					1.93622	1.5019	1.40338			2.57376	2.15939	1.4228
	4.1914	2.77745	2.10177			12.0151	4.29015	4.78899					1.65243	2.29082	1.81448			2.76025	2.30341	1.12999
	2.22719	1.12059	3.61499			24.5665	6.07861	6.72512					1.31399	2.27565	2.04809			3.3399	1.78351	4.75111
	1.32669	5.40785	2.70201			6.14943	4.69848	6.76834					1.45004	2.33305	2.58567			2.32865	2.15537	3.26763
	2.49978	3.23485	2.34171				6.55729	9.3781					1.59515	1.23859	1.53635			1.68686	2.78253	2.17597
													2.48964	2.30364	1.69607			3.71772	0.841565	3.41719
													1.97777	2.75866	2.3044			2.17057	1.42346	1.55246
													2.89251	1.20278	1.46181			1.80773	1.82731	3.75884
													2.10526	2.63358	1.59972			1.90534	1.19702	2.22173
													2.68424	1.61819	1.93058			3.53233	1.40168	1.4846
													1.93698	2.88528	0.723765			1.4977	2.01548	2.20626
													2.88299	2.45166	1.38315			2.06626	2.55664	2.59626
													2.15018	1.38206	2.13522			2.52205	1.78055	2.21448
													2.32615	1.75558	1.04523			2.50428	2.40449	3.14616
														1.42451	4.1284			2.7633	2.08123	2.79421

## Sheet: Antagonistic activity 
	The zone of interaction of mycelial hyphae with R. solani, mm
	M. robertsii				B. bassiana
	10d	15d	20d		10d	15d	20d
	1.17647	5.88235	34.7059		1.17647	4.70588	9.41176
	1.76471	6.47059	34.7059		1.17647	5.29412	10
	2.35294	7.05882	37.0588		1.17647	5.29412	9.41176
	1.76471	7.05882	35.8824		1.76471	5.88235	10
	1.17647	6.47059	35.2941		1.76471	5.88235	9.41176
