# Supplementary material for: Entomopathogenic fungi decreaseRhizoctoniadisease in potato in field conditions
Source: PeerJ journal article supplement (doi:10.7717/peerj.9895), 2020-09-16

7 weeks postplanting

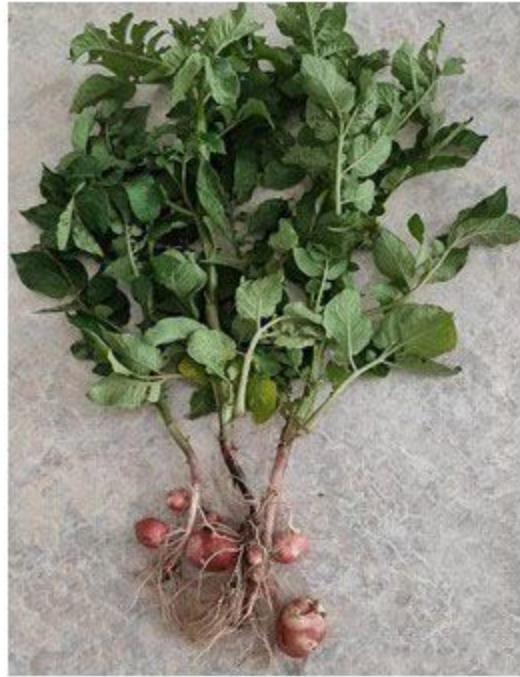

**Control**

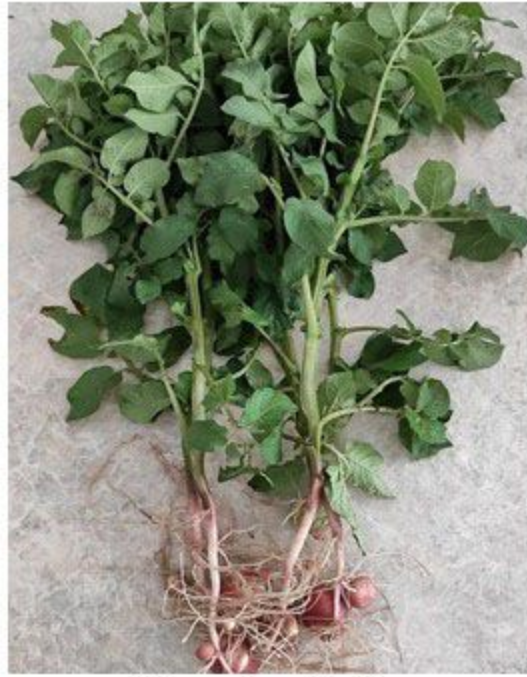

***M. robertsii***

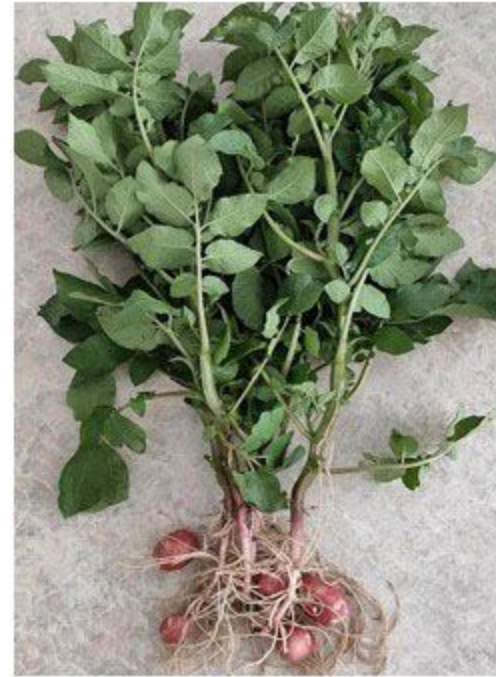

***B. bassiana***

13 weeks postplanting

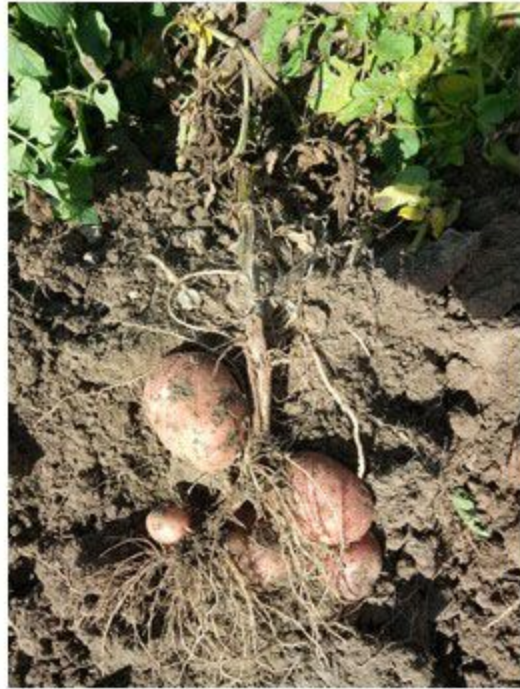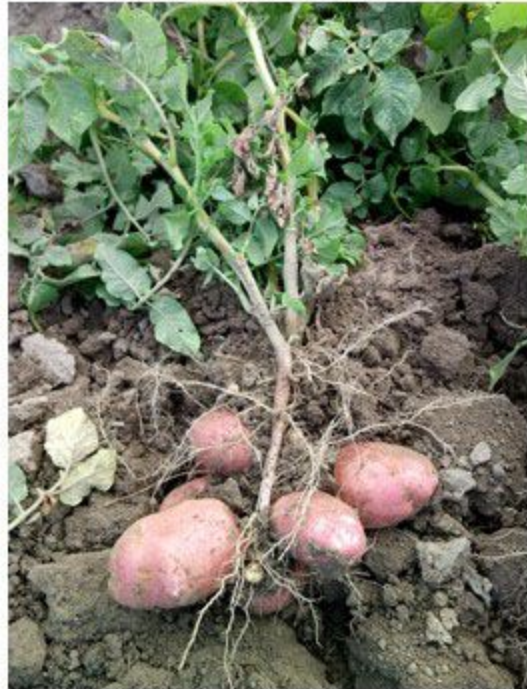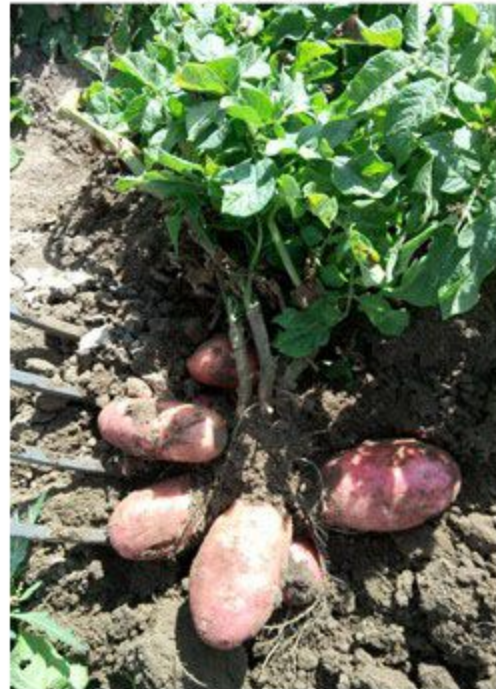

Supplement: Figure_S1.pdf [file Figure_S1.pdf]
