# Supplementary material for: Entomopathogenic fungi decreaseRhizoctoniadisease in potato in field conditions
Source: PeerJ journal article supplement (doi:10.7717/peerj.9895), 2020-09-16

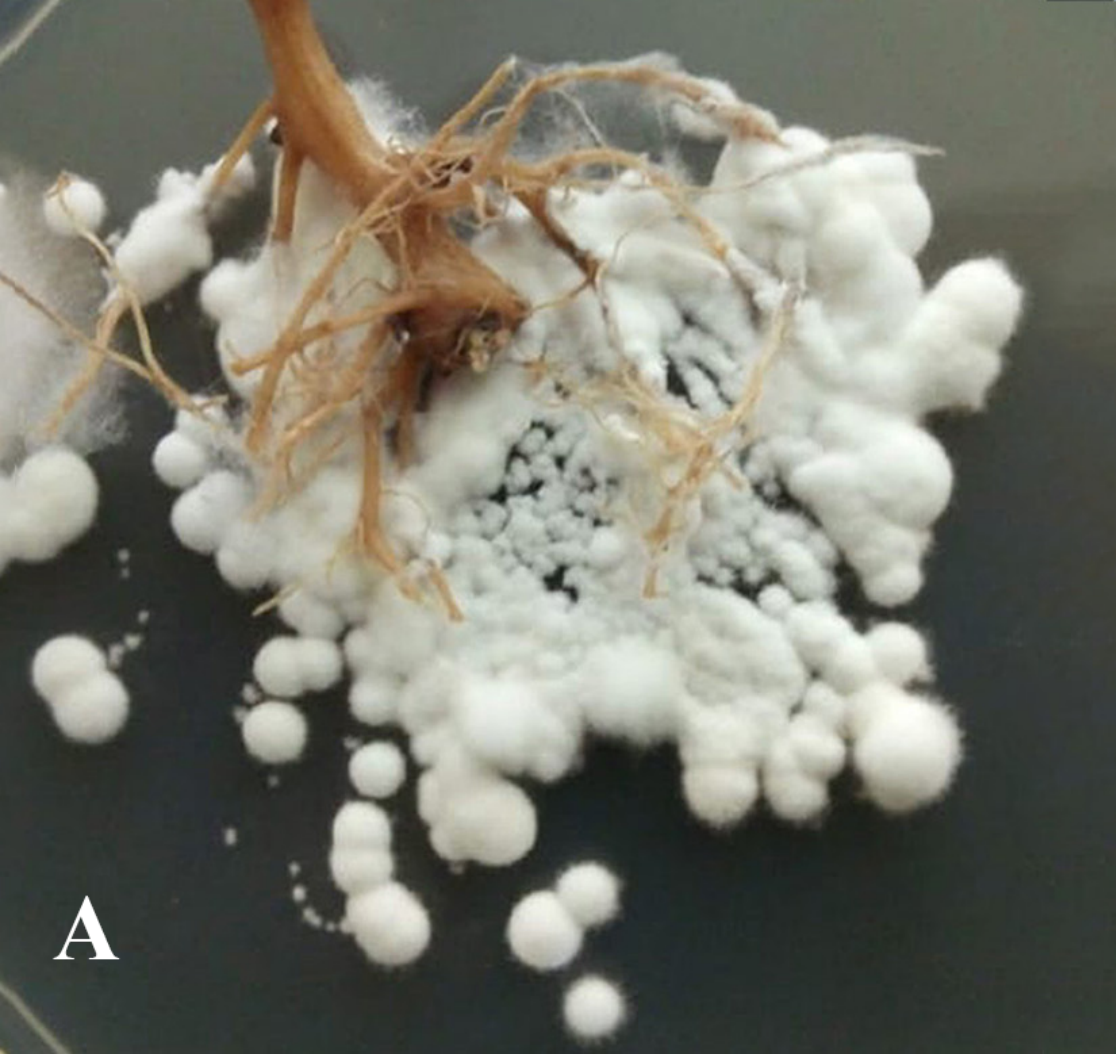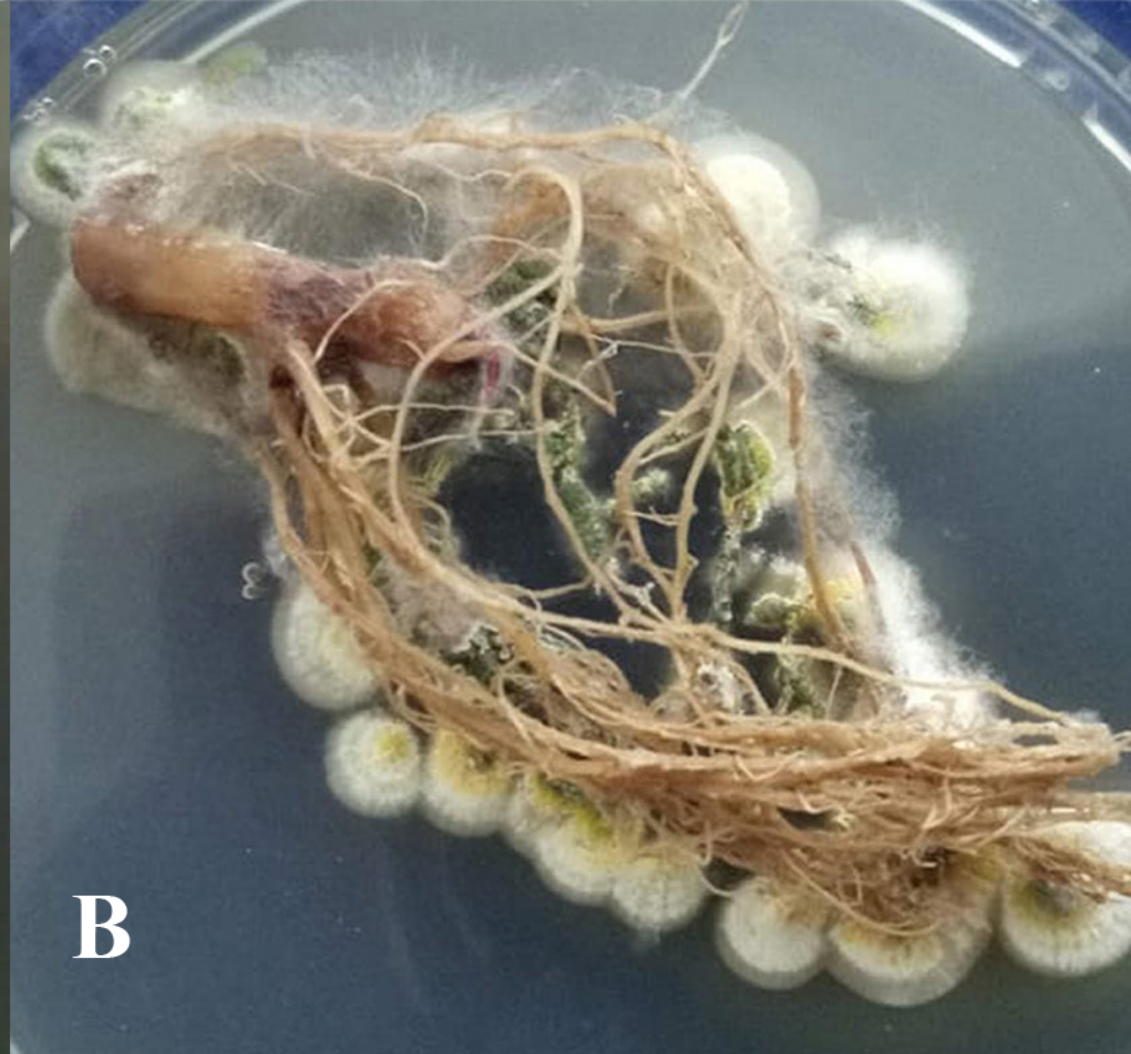

Supplement: Figure_S2.pdf [file Figure_S2.pdf]
